# Supplementary material for: Prevalence of hepatitis B and C and sensibility of a selective screening questionnaire in patients receiving chemotherapy for solid tumors
Source: Springer Nature journal article supplement (doi:10.1186/s12885-015-2033-z), 2015-12-01
Supplement: MOESM1 [file 9745852]

**QUESTIONNAIRE**  
*(translated from French)*

Last name (first 3 letters):      |\_|\_|\_|

First name (first 3 letters):      |\_|\_|\_|

Birth date:                      |\_|\_| |\_|\_| 19|\_|\_|

Are you or have you been involved in the following situations?

- |                                                                                                                      |                                                          |
|----------------------------------------------------------------------------------------------------------------------|----------------------------------------------------------|
| 1. Transfusion (red cells, platelets or plasma) before 1992?                                                         | <input type="checkbox"/> NO <input type="checkbox"/> YES |
| 2. Graft (tissue, organ or cells) before 1992?                                                                       | <input type="checkbox"/> NO <input type="checkbox"/> YES |
| 3. Major surgery, major bleeding, obstructed labor (traumatic), ICU stay before 1992?                                | <input type="checkbox"/> NO <input type="checkbox"/> YES |
| 4. Serious health problem at birth or premature birth?                                                               | <input type="checkbox"/> NO <input type="checkbox"/> YES |
| 5. Infusion of albumin, immunoglobulins, clotting factors before 1988?                                               | <input type="checkbox"/> NO <input type="checkbox"/> YES |
| 6. Liver disease (other than cancer)?<br>if yes which one: .....                                                     | <input type="checkbox"/> NO <input type="checkbox"/> YES |
| 7. « Jaundice »?                                                                                                     | <input type="checkbox"/> NO <input type="checkbox"/> YES |
| 8. Someone you know suffering from viral hepatitis?                                                                  | <input type="checkbox"/> NO <input type="checkbox"/> YES |
| 9. Hemodialysis?                                                                                                     | <input type="checkbox"/> NO <input type="checkbox"/> YES |
| 10. Intravenous drug use?                                                                                            | <input type="checkbox"/> NO <input type="checkbox"/> YES |
| 11. HIV seropositivity?                                                                                              | <input type="checkbox"/> NO <input type="checkbox"/> YES |
| 12. Tattoo, piercing, acupuncture without disposable devices?                                                        | <input type="checkbox"/> NO <input type="checkbox"/> YES |
| 13. Birth or medical care in Southeast Asia, Middle East, Africa or South America?<br>If yes, specify country: ..... | <input type="checkbox"/> NO <input type="checkbox"/> YES |
